# Supplementary material for: Prediabetes Conversion to Normoglycemia Is Superior Adding a Low-Carbohydrate and Energy Deficit Formula Diet to Lifestyle Intervention—A 12-Month Subanalysis of the ACOORH Trial
Source: PubMed Central journal article supplement (PMC7400892; doi:10.3390/nu12072022), 2020-07-07
Supplement: nutrients-12-02022-s001.pdf [file nutrients-12-02022-s001.pdf]

**Supplementary Table 1. Baseline characteristics of the dropouts.**

|                           | INT-group (n=31) | CON-group (n = 17) | P     |
|---------------------------|------------------|--------------------|-------|
| Sex (% male)              | 23.3             | 47.1               | 0.114 |
| Age (years)               | 51±12            | 51±9               | 0.974 |
| Weight (kg)               | 92±13            | 95±9               | 0.437 |
| BMI (kg/m <sup>2</sup> )  | 32.0±2.3         | 33.1±1.7           | 0.095 |
| WC (cm)                   | 107±8            | 110±8              | 0.346 |
| WHR                       | 0.94±0.08        | 0.97±0.11          | 0.353 |
| FM (kg)                   | 38±7             | 39±6               | 0.543 |
| FFM (kg)                  | 53±10            | 55±9               | 0.552 |
| HbA <sub>1c</sub> (%)     | 5.93±0.26        | 5.86±0.17          | 0.299 |
| (mmol/mol)                | 41.0±2.8         | 41.0±1.9           |       |
| FBG (mg/dl)               | 101±15           | 104±11             | 0.543 |
| FBI (uU/ml)               | 16.6±9.6         | 17.2±9.0           | 0.838 |
| HOMA-Index                | 4.1±2.3          | 4.4±2.3            | 0.651 |
| SBP (mmHg)                | 133±11           | 137±10             | 0.259 |
| DBP (mmHg)                | 88±10            | 91±10              | 0.246 |
| Total cholesterol (mg/dl) | 214±41           | 215±46             | 0.978 |
| HDL-C (mg/dl)             | 54±11            | 50±10              | 0.175 |
| LDL-C (mg/dl)             | 136±38           | 142±44             | 0.643 |
| Triglycerides (mg/dl)     | 141±58           | 140±58             | 0.953 |

Shown are means ± standard deviations, or percentages. BMI, body mass index; DBP, diastolic blood pressure; FBI, fasting blood insulin; FBG, fasting blood glucose; FM, fat mass; FFM, fat free mass; HDL-C, high-density lipoprotein cholesterol; LDL-C, low-density lipoprotein cholesterol; SBP, systolic blood pressure; WC, waist circumference; WHR, waist-to-hip ratio
